# Supplementary material
Source: MDPI journal article supplement (https://www.mdpi.com/2072-4292/11/9/1137)
Supplement: s1 [file s1]

# Supplementary 1: Questionnaire translated into English

## Photo Rating

(Participants were asked to answer question 1 and 2 for each of the nine photos shown)

1. How high would you rate the **structural richness** of this forest?
  - ☐ Very high structural richness
  - ☐ High structural richness
  - ☐ Mean structural richness
  - ☐ Low structural richness
  - ☐ Very low structural richness
  - ☐ I cannot rate this
  
2. How do you rate the **ecological value** of the recognizable structures with regard to biodiversity conservation?
  - ☐ Very high value
  - ☐ High value
  - ☐ Mean value
  - ☐ Low value
  - ☐ No value
  - ☐ I cannot rate this

## Rating procedure

3. How easy/difficult was it for you **to rate the structural richness**?

- ☐ Very difficult
- ☐ Difficult
- ☐ Partly
- ☐ Easy
- ☐ Very easy
- ☐ I don't know

4. Please indicate to what extent the following statements apply to your approach when **rating the ecological value**. (Please tick every line)

|                                                                                                                           | I totally agree          | I rather agree           | I neither agree nor disagree | I rather disagree        | I totally disagree       |
|---------------------------------------------------------------------------------------------------------------------------|--------------------------|--------------------------|------------------------------|--------------------------|--------------------------|
| I referred to my intuition.                                                                                               | <input type="checkbox"/> | <input type="checkbox"/> | <input type="checkbox"/>     | <input type="checkbox"/> | <input type="checkbox"/> |
| The stand structures (e.g. tree species, age classes, stratification etc.) were decisive for my rating.                   | <input type="checkbox"/> | <input type="checkbox"/> | <input type="checkbox"/>     | <input type="checkbox"/> | <input type="checkbox"/> |
| The tree structures (e.g. cavities, dead branches, crown deadwood, injuries and wounds etc.) were decisive for my rating. | <input type="checkbox"/> | <input type="checkbox"/> | <input type="checkbox"/>     | <input type="checkbox"/> | <input type="checkbox"/> |
| The ground vegetation was decisive for my rating.                                                                         | <input type="checkbox"/> | <input type="checkbox"/> | <input type="checkbox"/>     | <input type="checkbox"/> | <input type="checkbox"/> |
| The overall impression was decisive for my rating.                                                                        | <input type="checkbox"/> | <input type="checkbox"/> | <input type="checkbox"/>     | <input type="checkbox"/> | <input type="checkbox"/> |
| The optical-aesthetic diversity was decisive for my rating.                                                               | <input type="checkbox"/> | <input type="checkbox"/> | <input type="checkbox"/>     | <input type="checkbox"/> | <input type="checkbox"/> |

5. In how far did you consider the following structures when **rating the structural richness**?  
Please also tick those structures which did not appear, but for which you were searching for on the photos. (Please tick every line)

|                                      | Very strongly considered | Strongly considered      | Considered               | Hardly considered        | Not considered           |
|--------------------------------------|--------------------------|--------------------------|--------------------------|--------------------------|--------------------------|
| Deadwood                             | <input type="checkbox"/> |
| Stand gaps                           | <input type="checkbox"/> |
| Cavities                             | <input type="checkbox"/> |
| Epiphytes, mosses and lichen         | <input type="checkbox"/> |
| Injuries and wounds                  | <input type="checkbox"/> |
| Deformation and special growth forms | <input type="checkbox"/> |
| Tree species diversity               | <input type="checkbox"/> |
| Age structure                        | <input type="checkbox"/> |
| Ground vegetation                    | <input type="checkbox"/> |
| Other:                               | <input type="checkbox"/> |

6. How do you rate the importance of the following structures for the **conservation of biodiversity**?  
(Please tick every line)

|                                      | Extremely important      | Very important           | Quite important          | Slightly important       | Totally unimportant      | I can't judge            |
|--------------------------------------|--------------------------|--------------------------|--------------------------|--------------------------|--------------------------|--------------------------|
| Deadwood                             | <input type="checkbox"/> |
| Stand gaps                           | <input type="checkbox"/> |
| Cavities                             | <input type="checkbox"/> |
| Epiphytes, mosses and lichen         | <input type="checkbox"/> |
| Injuries and wounds                  | <input type="checkbox"/> |
| Deformation and special growth forms | <input type="checkbox"/> |
| Tree species diversity               | <input type="checkbox"/> |
| Age structure                        | <input type="checkbox"/> |
| Ground vegetation                    | <input type="checkbox"/> |

7. What species were you thinking of when rating the structures with regard to the **conservation of biodiversity**?

---

## Knowledge and experiences

8. Would you be confident to identify the previously mentioned structures (e.g. cavities, stand gaps, injuries and wounds) in the forest?

- ☐ All  
☐ Many  
☐ Partly  
☐ Few  
☐ None

9. How did you gain your knowledge about such structural elements in the forest?  
(Please tick every line)

|                                                | Completely               | Mostly                   | Partially                | Hardly                   | Not at all               |
|------------------------------------------------|--------------------------|--------------------------|--------------------------|--------------------------|--------------------------|
| Through talking to family and friends          | <input type="checkbox"/> |
| Through talking to forest owners               | <input type="checkbox"/> |
| Through talking to scientists                  | <input type="checkbox"/> |
| Through talking to nature conservation experts | <input type="checkbox"/> |
| Through talking to foresters                   | <input type="checkbox"/> |
| Through own observations                       | <input type="checkbox"/> |
| Through own practical experience               | <input type="checkbox"/> |
| Through apprenticeship or studies              | <input type="checkbox"/> |
| Through training courses                       | <input type="checkbox"/> |
| Through reading professional journals          | <input type="checkbox"/> |
| Through reading scientific publications        | <input type="checkbox"/> |
| Through the internet                           | <input type="checkbox"/> |
| Other:                                         | <input type="checkbox"/> |

10. Do you know any concepts or guidelines that consider biodiversity-relevant forest structures in order to protect biodiversity?

- ☐ Yes  
☐ No

If yes, which?

---

11. Do you have any practical experience in the selection of habitat/biotope trees?

- ☐ Yes  
☐ No

## Personal Data

12. Year of birth: \_\_\_\_\_ (year)

13. Place of residence (postal code): \_\_\_\_\_

14. Did you complete any apprenticeship, professional training or academic studies in forestry?

- ☐ Yes
- ☐ No

15. Did you complete any apprenticeship, professional training or academic studies in ecology or nature conservation?

- ☐ Yes
- ☐ No

16. Do you own forest?

- ☐ Yes
- ☐ No

17. Current occupation, from which you generate your main income:

---

18. If you have any suggestions, additions or comments, please note them below:

---

---

---
